# Supplementary material
Source: Springer Nature journal article supplement (https://www.springermedizin.de/resource/supplementary/13054_2009_7619_MOESM1_ESM.pdf/9730154)

## SV-Flotrac

## SV-TTE

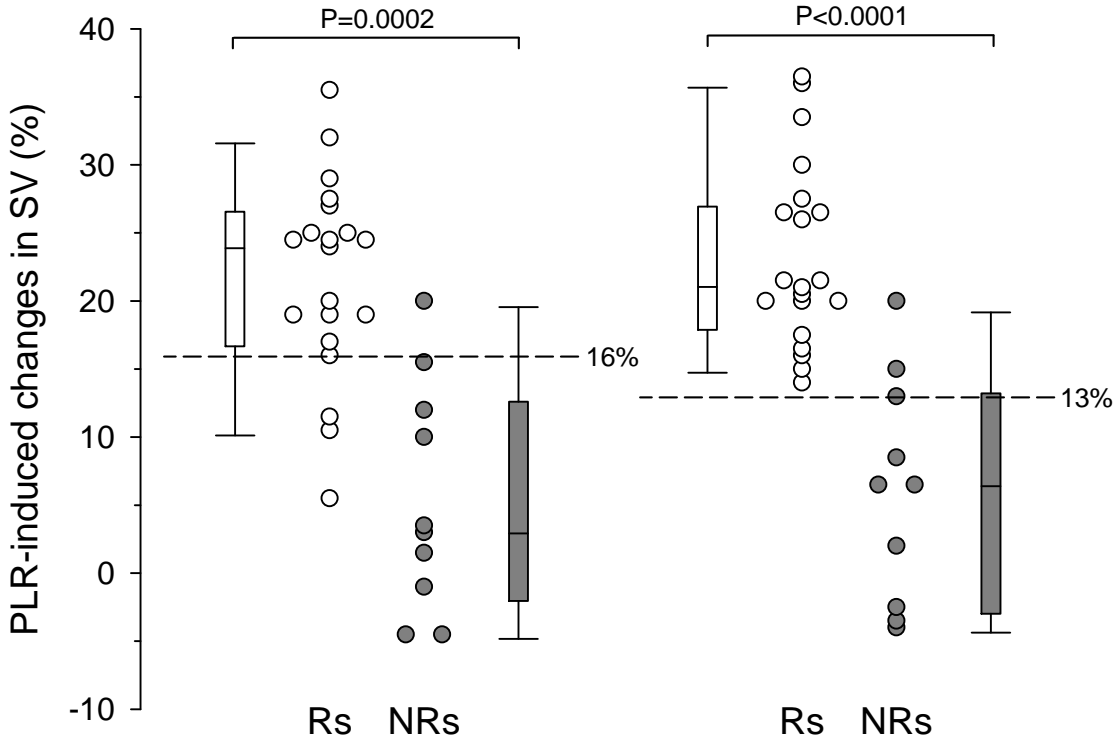

Supplement: MOESM1 [file 9730154]
